# Supplementary material for: Salt/pH dual-responsive supramolecular brush copolymer micelles with molecular recognition of nucleobases for drug delivery
Source: Royal Society of Chemistry journal article supplement (doi:10.1039/c2ra21923a), 2012-01-01
Supplement: c2ra21923a.pdf [file c2ra21923a.pdf]

## Supplementary Information

# **Salt/pH dual-responsive supramolecular brush copolymer micelles with molecular recognition of nucleobases for drug delivery**

Dali Wang,<sup>1</sup> Xiuying Huan,<sup>1</sup> Lijuan Zhu,<sup>1</sup> Jinyao Liu,<sup>1</sup> Feng Qiu,<sup>1</sup> Deyue Yan,<sup>1</sup> and Xinyuan Zhu\*<sup>1,2</sup>

<sup>1</sup>School of Chemistry and Chemical Engineering, State Key Laboratory of Metal Matrix Composites, Shanghai Jiao Tong University, 800 Dongchuan Road, Shanghai 200240, People's Republic of China.

<sup>2</sup>Instrumental Analysis Center, Shanghai Jiao Tong University, 800 Dongchuan Road, Shanghai 200240, People's Republic of China.

E-mail: xyzhu@sjtu.edu.cn

\* To whom correspondence should be addressed. Tel.: +86-21-34205699; Fax: +86-21-34205722.

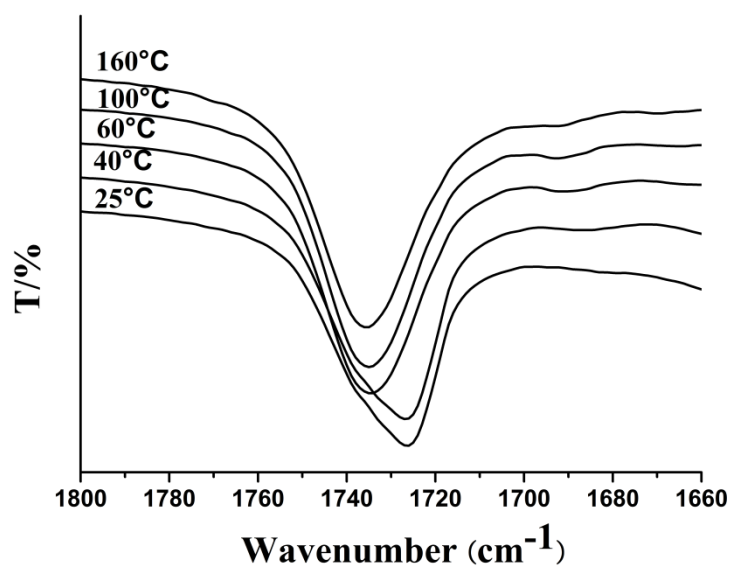

**Fig. S1.** Variable-temperature FTIR spectra in the 1800-1650 cm<sup>-1</sup> region of PHEMA-*g*-(PCL-A) and linear PEG-U complexes (the molar ratio of adenine and uracil was 1:1).

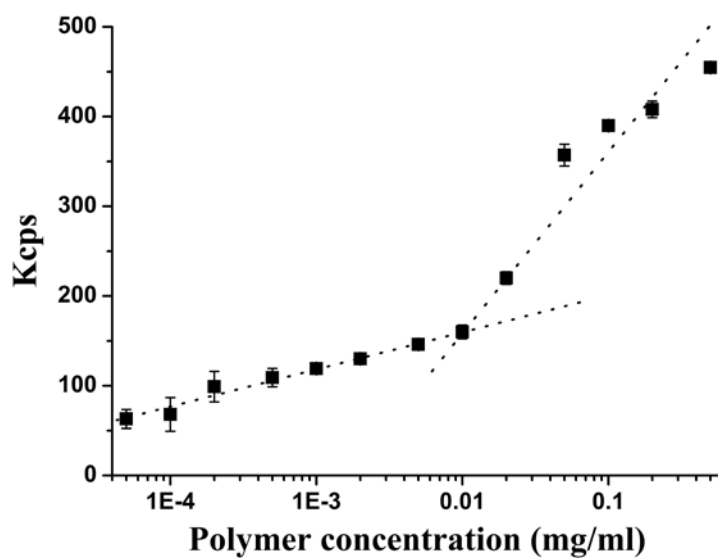

**Fig. S2.** CMC for supramolecular brush copolymer PHEMA-*g*-(PCL-A:U-PEG) in water determined by DLS at 298 K.

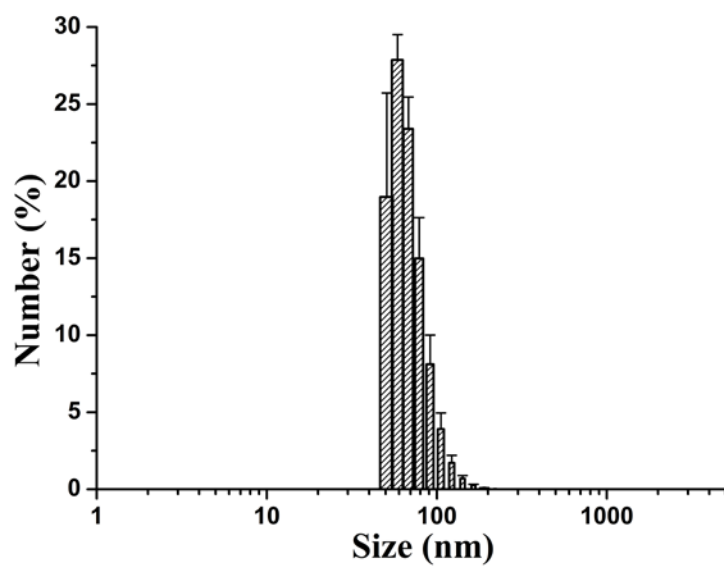

**Fig. S3.** Size distribution DOX-loaded PHEMA-*g*-(PCL-A:U-PEG) micelles.
